# Supplementary material for: Association of left ventricular longitudinal myocardial function with subclinical right ventricular dysfunction in type 2 diabetes mellitus
Source: PubMed Central journal article supplement (PMC8542339; doi:10.1186/s12933-021-01404-5), 2021-10-23

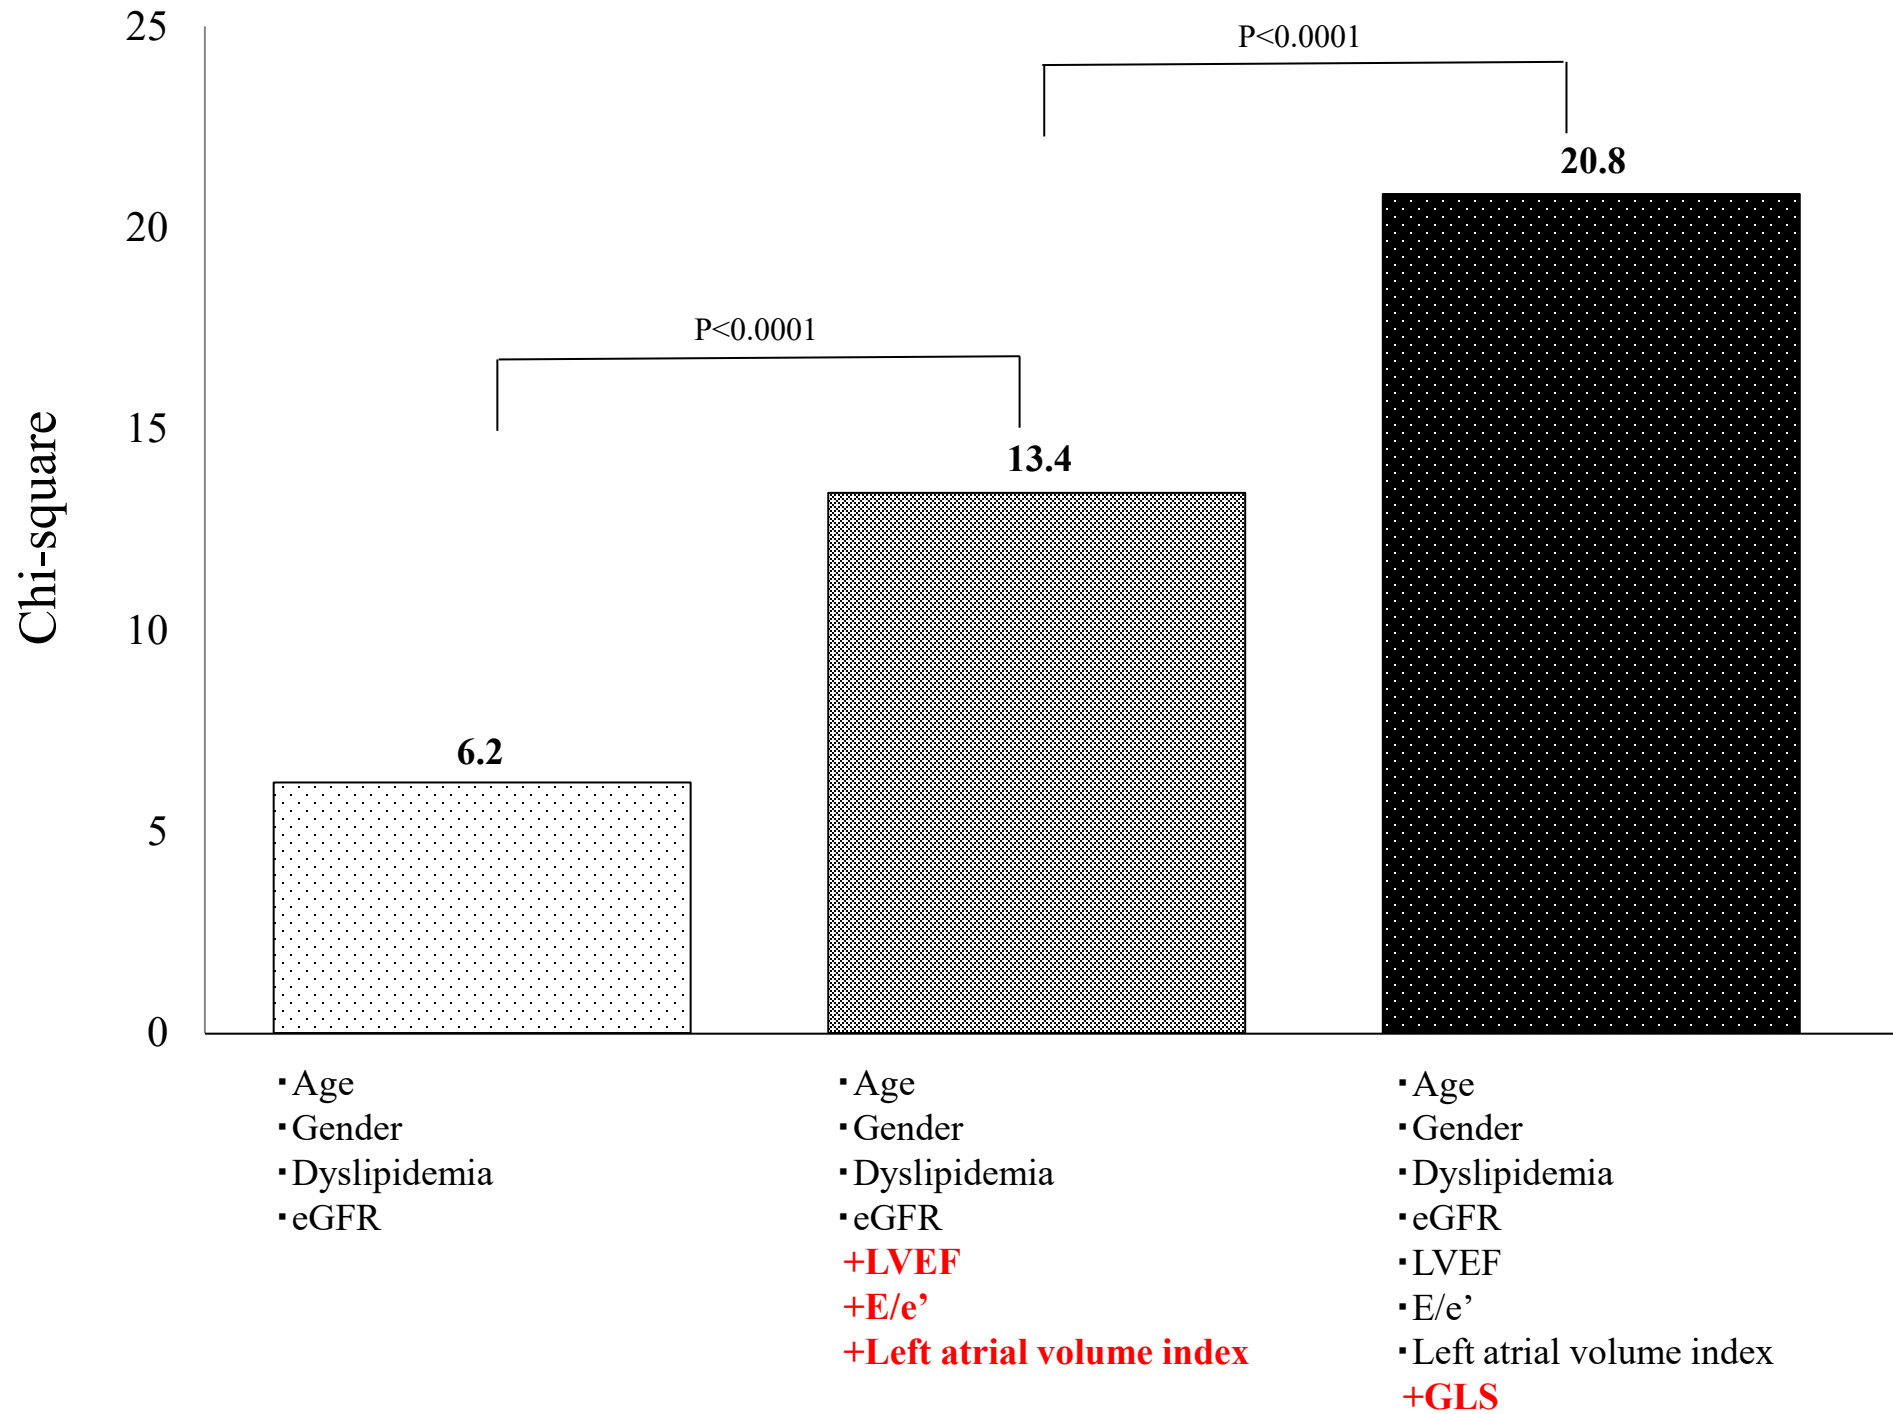

Supplement: 12933_2021_1404_MOESM1_ESM.pdf [file 12933_2021_1404_MOESM1_ESM.pdf]
